# Supplementary material for: RNA-seq of spinal cord from nerve-injured rats after spinal cord stimulation
Source: PubMed Central journal article supplement — Mol Pain. 2018 Nov 19;14:1744806918817429. doi: 10.1177/1744806918817429 (PMC6293371; doi:10.1177/1744806918817429), 2018-11-19
Supplement: Supplemental_Material.pdf [file Supplemental_Material.pdf]

**Supplemental Table 1.** Genes significantly increased in the ipsilateral spinal cord of males versus females after SCS

| Ensembl ID         | Gene symbol | Full gene name                                                                  | log2 Fold Change | Standard error | FDR      |
|--------------------|-------------|---------------------------------------------------------------------------------|------------------|----------------|----------|
| ENSRNOG00000057231 | Ddx3        | DEAD-box helicase 31                                                            | -8.30            | 0.46           | 3.33E-68 |
| ENSRNOG00000060048 | Eif2s3y     | Eukaryotic translation initiation factor 2, subunit 3, structural gene Y-linked | -8.64            | 0.61           | 3.41E-41 |
| ENSRNOG00000025670 | Shisa3      | Shisa family member 3                                                           | -3.13            | 0.47           | 1.76E-07 |
| ENSRNOG00000006096 | Slc26a7     | Solute carrier family 26 member 7                                               | -5.26            | 0.89           | 9.23E-06 |
| ENSRNOG00000022101 | Crabp2      | Cellular retinoic acid binding protein 2                                        | -2.10            | 0.38           | 8.49E-05 |
| ENSRNOG00000015567 | Slc9a2      | Solute carrier family 9 member A2                                               | -2.93            | 0.54           | 1.08E-04 |
| ENSRNOG00000012660 | Postn       | Periostin                                                                       | -2.42            | 0.47           | 4.18E-04 |
| ENSRNOG00000045829 | Thbs1       | Thrombospondin 1                                                                | -4.25            | 0.85           | 8.18E-04 |
| ENSRNOG00000005781 | Wnt16       | Wingless-type MMTV integration site family, member 16                           | -2.30            | 0.47           | 1.21E-03 |
| ENSRNOG00000013954 | Alpl        | Alkaline phosphatase, liver/bone/kidney                                         | -1.87            | 0.38           | 1.21E-03 |
| ENSRNOG00000039668 | Col8a1      | Collagen type VIII alpha 1 chain                                                | -1.59            | 0.33           | 1.21E-03 |
| ENSRNOG00000004516 | Itgb1       | Integrin subunit beta like 1                                                    | -1.77            | 0.37           | 1.63E-03 |
| ENSRNOG00000018748 | Slc16a11    | Solute carrier family 16, member 11                                             | -1.31            | 0.28           | 1.87E-03 |
| ENSRNOG00000029047 | Cubn        | Cubilin                                                                         | -2.25            | 0.49           | 3.18E-03 |
| ENSRNOG00000009204 | Il17re      | Interleukin 17 receptor E                                                       | -2.58            | 0.58           | 7.04E-03 |
| ENSRNOG00000036827 | Ppp1r1a     | Protein phosphatase 1, regulatory (inhibitor) subunit 1A                        | -1.37            | 0.31           | 1.04E-02 |
| ENSRNOG00000016299 | Klf4        | Kruppel like factor 4                                                           | -1.10            | 0.25           | 1.07E-02 |
| ENSRNOG00000029911 | Cilp        | Cartilage intermediate layer protein                                            | -1.49            | 0.35           | 1.19E-02 |
| ENSRNOG00000002385 | Prg4        | Proteoglycan 4                                                                  | -6.48            | 1.52           | 1.21E-02 |
| ENSRNOG00000012876 | Slc6a13     | Solute carrier family 6 member 13                                               | -1.40            | 0.33           | 1.24E-02 |
| ENSRNOG00000051854 | Enpep       | Glutamyl aminopeptidase                                                         | -1.42            | 0.34           | 1.25E-02 |
| ENSRNOG00000025001 | Pcolce      | Procollagen C-endopeptidase enhancer 2                                          | -1.53            | 0.36           | 1.41E-02 |
| ENSRNOG00000010832 | Pdgfrl      | Platelet-derived growth factor receptor-like                                    | -2.40            | 0.58           | 1.64E-02 |
| ENSRNOG00000033734 | Tnnt2       | Troponin T2, Cardiac Type                                                       | -2.94            | 0.71           | 1.73E-02 |
| ENSRNOG00000010840 | Adamts13    | ADAMTS-like 3                                                                   | -1.60            | 0.39           | 1.73E-02 |
| ENSRNOG00000016366 | Colec12     | Collectin sub-family member 12                                                  | -1.30            | 0.31           | 1.73E-02 |
| ENSRNOG00000060949 | Anxa8       | Annexin A8                                                                      | -3.37            | 0.83           | 2.18E-02 |
| ENSRNOG00000003172 | Serpinf1    | Serpin family F member 1                                                        | -1.79            | 0.44           | 2.27E-02 |
| ENSRNOG00000016085 | Mpzl2       | Myelin protein zero-like 2                                                      | -1.43            | 0.35           | 2.27E-02 |

|                     |         |                                            |       |      |          |
|---------------------|---------|--------------------------------------------|-------|------|----------|
| ENSRNOG00000004610  | Lum     | Lumican                                    | -1.31 | 0.33 | 2.69E-02 |
| ENSRNOG000000021155 | Ctsk    | Cathepsin K                                | -1.29 | 0.33 | 2.81E-02 |
| ENSRNOG000000059890 | Clec2d2 | C-type lectin domain family 2 member D2    | -5.34 | 1.38 | 4.00E-02 |
| ENSRNOG000000015902 | Cpxm2   | Carboxypeptidase X (M14 family), member 2  | -2.13 | 0.55 | 4.12E-02 |
| ENSRNOG000000009694 | Bmp4    | Bone morphogenetic protein 4               | -1.15 | 0.30 | 4.12E-02 |
| ENSRNOG000000006526 | Sema3c  | Semaphorin 3C                              | -1.09 | 0.28 | 4.26E-02 |
| ENSRNOG000000010265 | Ada     | Adenosine deaminase                        | -1.63 | 0.43 | 4.55E-02 |
| ENSRNOG000000010666 | Wisp2   | WNT1 inducible signaling pathway protein 2 | -2.56 | 0.67 | 4.58E-02 |
| ENSRNOG000000006553 | Bnc2    | Basonuclin 2                               | -1.80 | 0.47 | 4.58E-02 |
| ENSRNOG000000014426 | Lox     | Lysyl oxidase                              | -1.33 | 0.35 | 4.69E-02 |
| ENSRNOG000000039744 | RT1-CE4 | RT1 class I, locus CE4                     | -0.92 | 0.24 | 4.69E-02 |
| ENSRNOG000000014443 | Pde5a   | Phosphodiesterase 5A                       | -1.65 | 0.44 | 4.69E-02 |
| ENSRNOG000000010947 | Mmp14   | Matrix metalloproteinase 14                | -0.98 | 0.26 | 4.69E-02 |
| ENSRNOG000000043332 | Foxd1   | Forkhead box D1                            | -1.82 | 0.48 | 4.71E-02 |
| ENSRNOG000000009437 | Ewsr1   | EWS RNA-binding protein 1                  | -1.05 | 0.28 | 4.85E-02 |



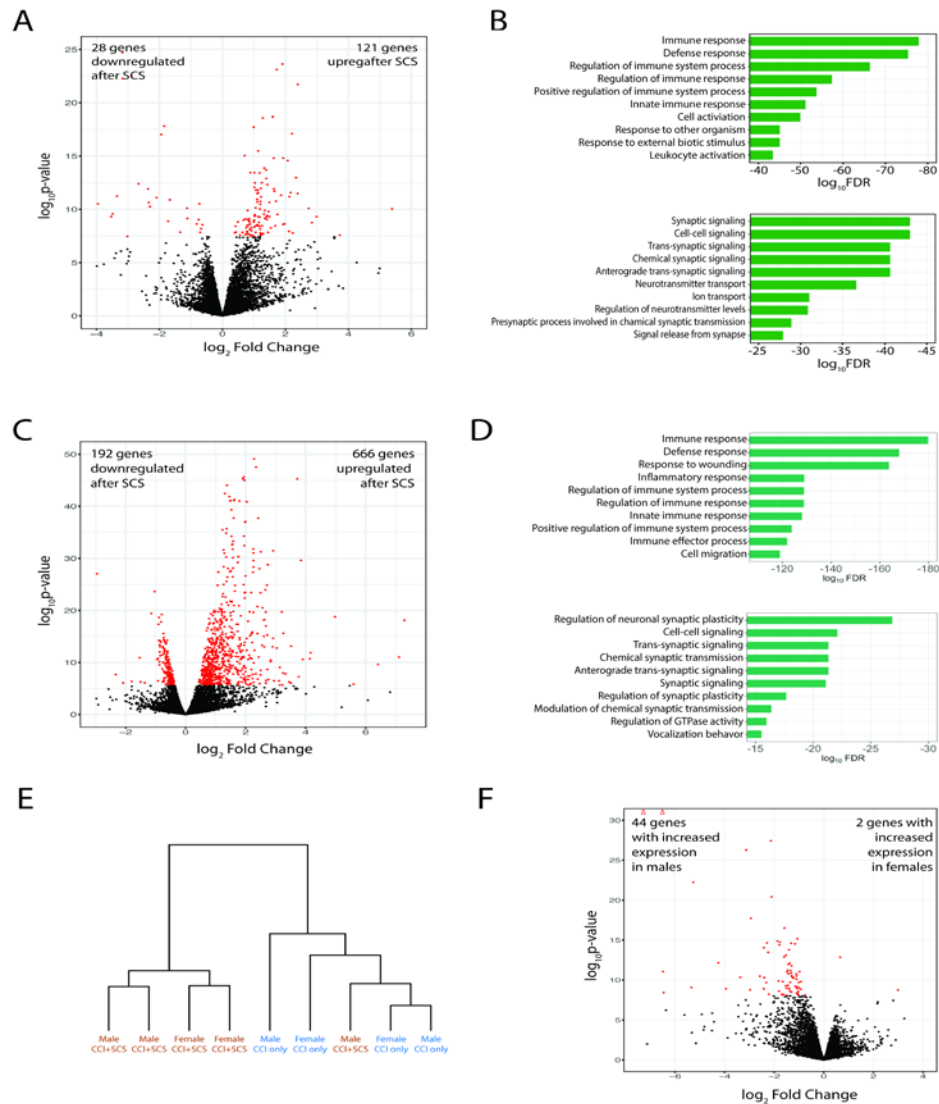

Supplemental figure 2. Sex differences in differential gene expression after SCS in CCI rats. (A) Volcano plot showing RNA-seq data of the ipsilateral spinal cord from CCI only and CCI+SCS male rats. DEGs are designated in red and are defined as differentially expressed genes with a FDR < 0.05. Triangles represent genes with extremely high  $\log_{10}$ FDR or  $\log_2$ fold change values. (B) Barplot showing the top GO biological processes associated with genes upregulated (FDR<0.05; top) and downregulated (unadjusted p-value<0.05; bottom) in male CCI+SCS versus CCI only rats. (C) Volcano plot showing RNA-seq data of the ipsilateral spinal cord from CCI only and CCI+SCS female rats. DEGs are designated in red and are defined as differentially expressed genes with a FDR < 0.05. Triangles represent genes with extremely high  $\log_{10}$ FDR or  $\log_2$ fold change values. (D) Barplot showing the top 10 GO biological processes associated with genes upregulated (top) and downregulated (bottom) in female CCI+SCS versus CCI only rats (FDR<0.05). (E) Dendrogram showing hierarchical clustering of samples by treatment group and sex of rat. (F) Volcano plot showing differentially expressed genes from the ipsilateral spinal cord of males versus female rats. Positive  $\log_2$  fold change indicates increased gene expression in female rats versus males. DEGs are designated in red and are defined as differentially expressed genes with a FDR < 0.05. Triangles represent genes with extremely high  $\log_{10}$ FDR or  $\log_2$ fold change values.
